1 **Preliminary efficacy of a community health worker homebased intervention for the control**  
2 **and management of hypertension in Kiambu County, Kenya- A randomized control trial**

3 Grace Wambura Mbutia<sup>1</sup>, James Mwangi<sup>2,3</sup>, Karani Magutah<sup>4</sup>, James Odhiambo Oguta<sup>5</sup>, Kenneth  
4 Ngure<sup>1</sup>, Stephen T. McGarvey<sup>6</sup>

5 <sup>1</sup>College of Health Sciences, Jomo Kenyatta University of Agriculture and Technology, P.O. Box  
6 62000- 0200 Nairobi, Kenya.

7 <sup>2</sup>School of Public Health and Community Development, Maseno University.

8 <sup>3</sup>World Health Organisation Somalia, ATMIS protected area, Mogandishu, Somalia.

9 <sup>4</sup>School of Medicine, College of Health Sciences, Moi University, P.O. Box 4606-30100, Eldoret,  
10 Kenya.

11 <sup>5</sup>Sheffield Centre for Health and Related Research, Division of Population Health, School of  
12 Medicine and Population Health, University of Sheffield, United Kingdom.

13 <sup>6</sup>International Health Institute, Department of Epidemiology, School of Public Health, and  
14 Department of Anthropology, Brown University, Providence, Providence, RI 02912, United  
15 States.

16

17 **Abstract**

18 In Sub Saharan Africa, there is a growing burden of non-communicable diseases, which poses a  
19 big challenge to the weak health system in these resource-limited settings. The aim of this study  
20 was to determine the feasibility and preliminary efficacy of a community health workers (CHW)  
21 home-based lifestyle interventions to improve blood pressure (BP) control and body composition  
22 among hypertensive patients in low-income populations of Kiambu County, Kenya. This was a  
23 randomized controlled trial (RCT) involving 80 patients with uncontrolled high BP (systolic BP  
24 (SBP)  $\geq 140$ mmHg and/or diastolic BP (DBP)  $\geq 90$ ) randomized to either a CHW homebased  
25 intervention or a usual care (control) arm and followed up for 6 months. The intervention involved  
26 monthly CHW home-visits for health education and audits on behavioral risk factors that affect  
27 BP. An adapted WHO stepwise questionnaire and international physical activity questionnaire was  
28 used to collect data on behavioral cardiovascular risk factors. To assess the main outcomes of BP,  
29 body mass index (BMI) and waist-height-ratio (WHtR), a survey was conducted at baseline, 3

30 months, and 6 months. Data regarding univariate, bivariate and multivariate (repeated  
31 measurements between and within groups) analysis at 5% level of significance were analyzed  
32 using STATA 18. Generalized estimating equations (GEE) for repeated measures were used to  
33 estimate changes in BP, BMI and WHtR, and to examine the association between the CHW  
34 intervention and BP control. The study revealed that 77.5% and 92.5% of the participants in usual  
35 care and intervention groups completed the follow-up, respectively. After 6 months of follow-up,  
36 there was a reduction in the mean SBP and DBP for both arms, and reductions in BMI and WHtR  
37 only in the intervention arm. The adjusted mean reduction in SBP (-8.4 mm Hg; 95% CI, -13.4 to  
38 -3.3; P=0.001) and DBP (-5.2 mm Hg 95% CI, -8.3 to -2.0; P<0.001) were significantly higher in  
39 the intervention group compared to the control group. The proportion of participants who achieved  
40 the controlled BP target of <140/90 mm Hg was 62.2% and 25.8% for the intervention and usual  
41 care arm, respectively. The proportion with controlled BP was significantly higher in the  
42 intervention arm compared to the usual care arm after adjusting for baseline covariates (AOR 2.8,  
43 95% CI 1.3- 6.0, p=0.008). There was no significant effect of the intervention on BMI and WHtR.  
44 In conclusion, a home-based CHW intervention was significantly associated with reduction in BP  
45 among hypertensive patients compared to usual care. Future fully powered RCTs to test the  
46 effectiveness of such interventions among low-income populations are recommended.

47

48 **Key words:** Community health workers, hypertension, blood pressure control, lifestyle  
49 intervention.

50 **Trial registration number:** PACTR202309530525257

51

52

53

54

55

## 56 **BACKGROUND**

57 In Sub Saharan Africa (SSA) there is a growing burden of non-communicable diseases (NCDs),  
58 which poses a big challenge to the weak health systems in these resource limited settings (Gouda  
59 et al., 2019; Moucheraud, 2018). Further, management of cardiovascular diseases (CVDs) in low  
60 resource settings is difficult due to limited human and financial resources. There is a need for  
61 research to explore innovative, cost effective, and contextually relevant primary care interventions  
62 to control BP levels and other cardiovascular risks factors amidst the growing dual burden of  
63 infectious and NCDs in SSA ("Poster Abstracts from the 7th Annual CUGH Conference: Bridging  
64 to a Sustainable Future in Global Health," 2016).

65 Community health workers (CHWs) are an affordable and sustainable solution for behavioural  
66 intervention delivery, and an important linkage between community and health care  
67 system(Gilmore & McAuliffe, 2013). In light of critical shortages in the health workforce in low  
68 and medium income countries (LMICs), CHWs, defined as members of a community with minimal  
69 formal training on health problems who provide basic health and medical care to their community,  
70 are increasingly recognized as an essential part of the health workforce needed to achieve public  
71 health goals (Jeet et al., 2017; Kok et al., 2015; Woldie et al., 2018; World Health Organization).  
72 The CHWs have been used effectively in LMICs to deliver NCDs preventive services, using  
73 informational as well as behavioural approaches with focus on primordial prevention of NCDs and  
74 screening as part of early diagnosis and management.

75 The CHWs are an integral part of health-care delivery system in Kenya. With the shortage of health  
76 workers, CHWs have the potential to supplement the formal health system in the struggle to  
77 achieve universal health coverage in the era of dual burden of infectious diseases and NCDs in  
78 Kenya and other LMICs. The CHWs may remove barriers to BP control and medication adherence

79 due to cultural, educational, and language differences between community members and the health  
80 care system(Brownstein et al., 2005). A systematic review on the effectiveness of CHWs  
81 interventions for management of hypertension in the United States showed significant  
82 improvement in BP control particularly among the poor, urban minority communities (Brownstein  
83 et al., 2007). Similarly, community health workers home-based interventions have shown positive  
84 impact in the management and control of hypertension in LMICs (Cappuccio et al., 2006; He et  
85 al., 2017; Jafar et al., 2009; Neupane et al., 2018; Vedanthan et al., 2019). Another systematic  
86 review in LMICs reported positive effects of CHW interventions on improved linkage of patients  
87 to care, reduction of BP, improving adherence of patients to medication and the overall reduction  
88 in the CVD risk score (Mbutia, Magutah, & Pellowski, 2022).

89 One of the ways to address the emerging burden of hypertension could be through home BP  
90 monitoring and lifestyle interventions led by CHWs. Home BP monitoring has been proven as an  
91 effective tool in the management of hypertension (Glynn et al., 2010; Pickering et al., 2008).  
92 Compared to measurements in a health facility, home BP monitoring minimizes the “white coat”  
93 effect and allows for frequent and multiple readings (Stergiou & Bliziotis, 2011; Verberk et al.,  
94 2005) which provide additional BP measurements leading to better treatment decisions. It has been  
95 shown that use of electronic cuffs for home BP monitoring is effective in reaching target BP  
96 reduction goals than BP monitoring in a clinical setting alone (Cappuccio et al., 2004) and when  
97 combined with other interventions such as patients’ education and lifestyle counselling is  
98 associated with even better BP control (Tucker et al., 2017).

99 Hypertension is the leading risk factor for deaths due to CVDs and as such, the World Health  
100 Organization (WHO) targets to have a worldwide 25% reduction in its prevalence by the year 2025  
101 (World Health Organization, 2014). The STEPwise survey shows 24% of Kenyans either had

102 elevated BP or were on treatment for hypertension. Only 8% of the hypertensive persons were on  
103 treatment, and among them, only 4.6% had controlled BP (Kenya Ministry of Health, 2016). Based  
104 on literature, modification of lifestyle factors can delay onset of hypertension and can contribute  
105 to lowering of BP in treated patients (Gabb et al., 2016; Whelton et al., 2002). Systematic reviews  
106 have shown efficacy of interventions focused on physical activity (Pescatello et al., 2019; Smart  
107 et al., 2020) and dietary approaches to stop hypertension (Filippou et al., 2020; Saneei et al., 2014;  
108 Siervo et al., 2015) in lowering BP among adults with or without hypertension in different settings.

109 The feasibility and effectiveness of CHWs primary health intervention in the control of  
110 hypertension in Kenya is not well explored. Previous research conducted in Western Kenya  
111 demonstrated efficacy of CHWs intervention in improving linkage to hypertension health care  
112 (Vedanthan et al., 2019) in the general population. However, there is a lack of uptake of evidence-  
113 based community based CHWs interventions for reduction of BP in the Kenyan settings. There is  
114 a need for further studies to support primary health interventions geared towards control of  
115 hypertension and CVD outcomes among hypertensive patients in the Nairobi metropolitan area  
116 where the current study is set. While previous CHWs hypertension interventions in LMICs have  
117 focused on screening and health education, the current study proposes to adapt a multicomponent  
118 evidence-based lifestyle intervention that incorporates behaviour change communication and  
119 practical individualized lifestyle interventions to reduce high BP and other CVD risks among low-  
120 income population in Kiambu County. The aim of this study is to test the feasibility and  
121 preliminary efficacy of a CHW-led lifestyle homebased intervention for BP reduction among  
122 hypertensive patients.

123

124

## 125 **METHODS**

126 **Research design:** This was a randomized controlled trial (RCT). Hypertensive patients were  
127 randomised at individual level to either the CHW-led homebased intervention or the usual care  
128 arm. Those assigned to the intervention arm were advised to continue receiving their usual care.  
129 The intervention was implemented for 6 months with outcome assessment after 3<sup>rd</sup> and 6<sup>th</sup> month.

130 **Study area:** The study was conducted in level 3 primary health care (PHC) facilities in Juja and  
131 Ruiru Sub-counties in Kiambu County, Kenya.

132 **Study population:** Patients with high BP (systolic  $\geq 140$  mmHg and/or diastolic  $\geq 90$  mmHg  
133 measured on at least 2 separate screening measurements), aged 18 years and above, receiving  
134 primary care from the selected level 3 PHC facilities and available to be followed up for 6 months.  
135 Participants commenced on antihypertensive medications were included. Elderly hypertensive  
136 patients aged above 70 years, hypertensive patients already on hypertension follow-up and  
137 management elsewhere or wished to relocate from the study area during the study period were  
138 excluded.

139 **Sample size and power calculation:** With changes in BP as the primary outcome, we  
140 calculated a sample of 52 participants for the 2 arms (26 in each). This would show changes in  
141 BP between the intervention and control arms at a significance level of 0.05 for a two-sided test  
142 with 80% statistical power of finding a large effect (*Cohen's d*=0.80). This study was  
143 underpowered to find significantly small effect (*Cohen's d*=0.30) and moderate effect  
144 (*Cohen's d*=0.50). However, we were able to calculate an effect size and show the direction  
145 of its impact. After adjusting for 20% loss to follow-up, the total sample was 62 participants.

146 **Sampling and participants recruitment:** The participants were recruited at Ruiru and Juja level  
147 3 primary health facilities following referral from a community-based door-to-door BP screening  
148 in the study area (Fig 1).The recruitment took place from October to November 2022. Participants  
149 with high BP (systolic  $\geq 140$  mmHg and/or diastolic  $\geq 90$  mmHg) were given a referral note to  
150 either Juja or Ruiru primary health facility. After clinician's assessment and commencement of  
151 management, participants with high BP willing to participate were recruited into the study. Simple  
152 random sampling was used to allocate the two PHC facilities (and the patients receiving care there)  
153 to either the control usual care or CHW home-based intervention arms.

154 **Data collection:** An adapted WHO stepwise questionnaire (Supplementary material 1) was used  
155 to collect information on demographic characteristics and health behaviours (smoking, alcohol  
156 drinking, diet and physical activity (PA)) of participants at baseline and follow-up visits. The  
157 international PA questionnaire (IPAQ)(Craig et al., 2003) was used to collect data on PA. Three  
158 BP measurements, body weight, height and waist circumference were obtained at each data  
159 collection visit by outcome assessors masked to intervention assignment. Blood pressure was  
160 measured using a digital (Omron M1) BP machine according to American Heart Association  
161 Guidelines. The guidelines include resting seated for 5 minutes prior to monitoring, abstaining  
162 from smoking, drinking, and exercise 30 minutes prior, and recording three measurements each  
163 time the monitor is used and an average obtained (Pickering et al., 2008). Weight was measured  
164 using a bathroom scale (CAMRY Mechanical scale, BR9012, Shanghai, China) with the subject  
165 in light clothing and without shoes.

166 The primary outcomes were the differences in systolic and diastolic BP (SBP and DBP  
167 respectively) changes from baseline to the 6 month follow-up survey while secondary outcomes  
168 included the proportion of patients with controlled hypertension (BP  $< 140/90$  mm Hg) according

169 to the Kenyan national guidelines (Division of Non-Communicable Diseases-Ministry of Health,  
170 2018), body composition – body mass index (BMI) (World Health Organization, 2000), and waist  
171 height ratio (WHtR) (Ashwell, Gunn, & Gibson, 2012). The outcome measures were assessed at  
172 baseline, 3 months, and 6 months of follow-up. Physically active was defined as having attained  
173 150 minutes of moderate PA or 75 minutes of vigorous PA each week.

174

175 **Study procedure:** The research assistants completed a baseline assessment for the eligible  
176 participants. Those in the intervention arm received a homebased community health worker–led  
177 intervention (health coaching, home BP monitoring, BP audit and feedback) implemented over a  
178 period of 6 months. This entailed two home visits by the trained CHWs during the first month  
179 after randomisation, followed by monthly follow-up visits for a period of 6 months. The initial  
180 visit was a 90-minute home visit to discuss general knowledge about hypertension and offer  
181 tailored counselling on lifestyle modification as well as set PA targets. Subsequent monthly visit  
182 was focused on social support, goal setting, BP, and weight monitoring.

183 To assess the outcome of the intervention, the survey was conducted by two trained research  
184 assistants (who were not part of nor had relationship with the CHWs team) to evaluate the  
185 participants at baseline, 3 months, and 6 months. The research assistants were blinded to the  
186 randomization status of the participants. The home visits for evaluation were scheduled during the  
187 first half of the day to minimize the effect of diurnal variations in BP.

188 *Figure 1: Consolidated Standards of reporting Trials describing recruitment and completion of*  
189 *study procedures*

190

191



192 **Data analysis:** The *Stata* 18 software (Stata Corporation, College Station, Texas, USA) was used  
193 for data entry and analysis. Descriptive statistics were used for participants' characteristics.  
194 Categorical data were analyzed and reported in frequency and percentages. Independent samples  
195 t-test was used to determine whether baseline characteristics (continuous variables) differed  
196 significantly between the control and the usual care arms at baseline while differences in the  
197 categorical variables between the arms were analyzed using a test for 2-sample differences in  
198 proportions. Mean BP and BMI changes from baseline were estimated with using generalized  
199 estimating equations (GEE) model for repeated measures using gaussian identity link function  
200 while adjusting for baseline characteristics; antihypertensive treatment and demographic  
201 characteristics. The GEE model was also used to examine the association between the CHW  
202 intervention with BP control normal BMI, specifying logit link function and reporting odds ratios,  
203 after controlling for baseline BP, baseline BMI, baseline WHtR, age, sex, and use of  
204 antihypertensive medication. Statistical significance was considered at  $P < 0.05$ .

205 **Ethical considerations:** The study was approved by Jomo Kenyatta University of Agriculture  
206 and Technology (JKUAT) Institutional scientific and ethical review committee (approval number  
207 JKU/IERC/02316/0652). Similarly, research permit was obtained from the National Commission  
208 of Science, Technology, and Innovation before commencement of the study (license number  
209 NACOSTI/P/22/19977). Confidentiality and anonymity of patients was guaranteed by excluding  
210 unique identifiers from the data collected from participants. Participation in the study was on  
211 voluntary basis and written informed consent was obtained from the participants before data  
212 collection.

213 This study is registered in the Pan African Clinical Trial Registry database, registration number  
214 PACTR202309530525257

215 **RESULTS**

216 A total of 80 participants (40 in each arm) were recruited in the study. Of these, 31(77.5%) of the  
 217 participants in usual care and 37(92.5%) in intervention arm completed the follow-up (Figure 1).  
 218 The mean age of the participants was 46.8±11.1 years and ranged from 25-68 years. At baseline,  
 219 the mean SBP, DBP and BMI were 153 mmHg, 97 mmHg and 29.5 kg/m<sup>2</sup>, respectively. A majority  
 220 of the participants were physically active in both arms with 81% and 90% in the intervention and  
 221 usual care arm respectively, reporting having achieved at least 75 minutes of vigorous intensity or  
 222 150 minutes of moderate intensity activity per week. Only 6% of the participants smoked cigarettes  
 223 and a quarter (25%) consumed alcohol. Approximately half of the respondents, 43% in the  
 224 intervention and 54% in the usual care arms, were on antihypertensive treatment. There were no  
 225 statistically significant differences in the baseline characteristics between the two arms (Table 1).

226 **Table 1: Baseline characteristics of the participants**

| <b>Variable</b>                                                                                                    | <b>Usual Care arm (N=31) Mean (SD) or n (%)</b> | <b>Lifestyle Intervention (N=37) Mean (SD) or n(%)</b> | <b>Absolute difference (95% CI)</b> | <b>P- Value</b>     |
|--------------------------------------------------------------------------------------------------------------------|-------------------------------------------------|--------------------------------------------------------|-------------------------------------|---------------------|
| Age in years                                                                                                       | 46.3(9.7)                                       | 47.3(14.4)                                             | -0.55(-6.04-4.93)                   | -0.841 <sup>†</sup> |
| SBP(mmHg)                                                                                                          | 155.7(18.3)                                     | 151.7(10.4)                                            | 4.03(-3.04-11.1)                    | 0.258 <sup>†</sup>  |
| DBP(mmHg)                                                                                                          | 97.1(11.8)                                      | 95.7(11.2)                                             | 1.42(-4.17-7.01)                    | 0.613 <sup>†</sup>  |
| BMI(kg/m <sup>2</sup> )                                                                                            | 29.7(5.5)                                       | 29.3(6.1)                                              | 0.50(-2.3-3.32)                     | 0.722 <sup>†</sup>  |
| WHtR                                                                                                               | 0.59(0.12)                                      | 0.61(0.10)                                             | -0.01(-0.06-0.04)                   | 0.682 <sup>†</sup>  |
| <b>Gender</b>                                                                                                      |                                                 |                                                        |                                     |                     |
| Male                                                                                                               | 5(16.7)                                         | 5(13.5)                                                | -0.02(-0.19-0.14)                   | 0.761*              |
| Female                                                                                                             | 25(83.3)                                        | 32(86.5)                                               |                                     |                     |
| <b>Physically active (achieved 75 minutes of vigorous intensity or 150 minutes of moderate intensity activity)</b> |                                                 |                                                        |                                     |                     |
| No                                                                                                                 | 3(9.7)                                          | 7(18.9)                                                | 0.09(-0.07-0.25)                    | 0.284*              |
| Yes                                                                                                                | 28(90.3)                                        | 30(81.1)                                               |                                     |                     |
| <b>Smoking</b>                                                                                                     |                                                 |                                                        |                                     |                     |
| No                                                                                                                 | 27(90)                                          | 36(97.3)                                               | 0.06(-0.04-0.19)                    | 0.223*              |
| Yes                                                                                                                | 3(10)                                           | 1(2.7)                                                 |                                     |                     |
| <b>Alcohol Use</b>                                                                                                 |                                                 |                                                        |                                     |                     |

|                                        |          |          |                   |        |
|----------------------------------------|----------|----------|-------------------|--------|
| No                                     | 22(70.9) | 29(78.4) |                   |        |
| Yes                                    | 9(29)    | 8(21.6)  | 0.07(-0.13-0.28)  | 0.482* |
| <b>On anti-hypertensive</b>            |          |          |                   |        |
| No                                     | 17(54.8) | 16(43.2) | -0.11(-0.35-0.12) | 0.341* |
| Yes                                    | 14(45.2) | 21(56.8) |                   |        |
| <b>Consumption of deep fried foods</b> |          |          |                   |        |
| Rarely                                 | 20(64.5) | 21(56.8) |                   |        |
| Frequently(more than twice a week)     | 11(35.5) | 16(43.2) | -0.08(-0.31-0.15) | 0.514  |

227 **SBP-** Systolic blood pressure **DBP-** Diastolic blood pressure **BMI-** Body mass index **WHtR-** Waist height ratio.

228 † P value for differences in continuous variables was generated using independent samples t-test.

229 \*P values for categorical variables was generated using a test for 2-sample differences in proportions.

230

### 231 **Implementation and adherence to the Intervention**

232 In addition to the usual care, the intervention arm received monthly home visits by the CHW for a  
 233 period of 6 months. A majority (92.5%) received all the planned visits while the rest only  
 234 completed 33% of the visits and were not available for outcome assessment thus were loss to  
 235 follow-up. Using a health education checklist (Supplementary material 2) the initial visit was  
 236 focused on general knowledge about hypertension and tailored counselling on lifestyle  
 237 modifications on PA and diet (reduction of salt intake, increase fruits and vegetables and reduction  
 238 of deep fried foods) as well as goal setting. Subsequent monthly visits were focused on BP and  
 239 weight audits, review on achievement of at least 150 minutes of moderate PA and counselling on  
 240 treatment adherence (for those on anti-hypertensives). Thirty-one (77.5%) of the participants in  
 241 the usual care arm were available for the 3 home visits focused on outcome assessments while 5  
 242 and 4 participants were available for one and two visits, respectively.

243

244

245 **Blood pressure and body composition outcomes**

246 Table 2 presents the mean measurements of the sample at different time points. After 6 months of  
 247 follow-up, there was a reduction in the mean SBP, DBP in all the arms and a reduction in BMI and  
 248 WHtR only among the intervention arm (Table 2).

249 **Table 2: Mean Blood pressure and body composition measures over 6 months**

| <b>Variable</b>             | <b>Arm</b>   | <b>Month 0<br/>Mean (SD)</b> | <b>Month 3 Mean<br/>(SD)</b> | <b>Month 6<br/>Mean (SD)</b> |
|-----------------------------|--------------|------------------------------|------------------------------|------------------------------|
| SBP<br>(mmHg)               | Usual Care   | 155.7(18.3)                  | 155.3(13.6)                  | 147.8(18.1)                  |
|                             | Intervention | 151.7(10.4)                  | 140.8(17.1)                  | 132.7(9.5)                   |
| DBP<br>(mmHg)               | Usual Care   | 97.1(11.8)                   | 98.9(7.8)                    | 93.3(10.1)                   |
|                             | Intervention | 95.7(11.2)                   | 90.8(11.7)                   | 85.7(7.7)                    |
| BMI<br>(kg/m <sup>2</sup> ) | Usual Care   | 29.7(5.5)                    | 29.4(4.8)                    | 30.1(4.9)                    |
|                             | Intervention | 29.3(6.1)                    | 28.9(5.7)                    | 28.4(5.4)                    |
| WHtR                        | Usual Care   | 0.60(0.1)                    | 0.62(0.1)                    | 0.61(0.1)                    |
|                             | Intervention | 0.61(0.1)                    | 0.61(0.1)                    | 0.59(0.1)                    |

250 **SD-** Standard deviation **SBP-** Systolic blood pressure **DBP-** Diastolic blood pressure **BMI-** Body mass index  
 251 **WHtR-** Waist height ratio.

252 The mean SBP in the intervention arm reduced by 19 mm Hg (95% CI -21.04 to -16.9), while in  
 253 the usual care arm it had reduced by 7.9 mm Hg (95% CI -11.8 to -4.0). Similarly, the mean  
 254 unadjusted DBP fell by 9.9 mm Hg (95% CI -13.1 to -6.6) in the intervention arm and 3.8 mmHg  
 255 (95% CI -8.5 to -0.9) in the usual care arm (Fig 2). The mean BMI increased by 0.40 kg/m<sup>2</sup> in the  
 256 usual care arm whereas in the intervention arm it reduced by -0.90 kg/m<sup>2</sup>. Similarly, the mean  
 257 WHtR in the usual care arm increased by 0.003 while that of the intervention arm reduced by -  
 258 0.02 as shown in table two.

259 *Figure 2: Mean change in blood pressure after 6 months of follow-up*

260  
 261  
 262

263 **Between group differences in mean changes**

264 Table 3 presents the difference in the net changes in BP, BMI and WHtR between the intervention  
 265 groups. The adjusted mean reduction in SBP was 8.4 mm Hg greater in the intervention group than  
 266 in the control group (95% CI, -13.4 to -3.3; P=0.001) while the adjusted mean reduction in DBP  
 267 in the intervention arm compared to the control {5.2 mm Hg (95% CI, -8.3 to -2.0; P<0.001)}  
 268 (Table 3). However, the observed adjusted net mean difference in BMI (-1.5; 95% CI, -3.7 to 0.6;  
 269 P=0.158) and WHtR (0.0; 95% CI, -0.03 to 0.03; P=0.999) between the two groups were not  
 270 statistically significant.

271 **Table 3: Effect of the intervention on Mean changes in blood pressure and body**  
 272 **composition measures after 6 months of follow-up**

| Variable                 | Arm              | Unadjusted mean change within each arm (95% CI) | Unadjusted net mean change between the arms(95% CI) | P Value | Adjusted net mean change (95% CI) | P value |
|--------------------------|------------------|-------------------------------------------------|-----------------------------------------------------|---------|-----------------------------------|---------|
| SBP (mmHg)               | Usual Care       | -7.9(-11.8 to -4.0 )                            | -11.2 (-16.9 to -5.6)                               | <0.001  | -8.4(-13.4 to -3.3)               | 0.001   |
|                          | Intervention grp | -19(21.04 to -16.9)                             |                                                     |         |                                   |         |
| DBP (mmHg)               | Usual Care       | -3.8 (-8.5to -0.9)                              | -5.7 ( -9.5 to -1.8)                                | 0.004   | -5.2 (-8.3 to -2.0)               | 0.001   |
|                          | Intervention grp | -9.9(-13.1 to -6.6)                             |                                                     |         |                                   |         |
| BMI (kg/m <sup>2</sup> ) | Usual Care       | 0.40(-0.002- 0.81)                              | -1.0 (-3.5 to 1.6)                                  | 0.453   | -1.5 (-3.7 to 0.6)                | 0.158   |
|                          | Intervention grp | -0.90(-1.3 to -0.49)                            |                                                     |         |                                   |         |
| WHtR                     | Usual Care       | 0.003(-0.01 to 0.01)                            | -0.006 (-0.04 to 0.04)                              | 0.792   | 0.0 (-0.03 to 0.03)               | 0.999   |
|                          | Intervention grp | -0.02(-0.03 to -0.01)                           |                                                     |         |                                   |         |

273 SBP- Systolic blood pressure DBP- Diastolic blood pressure BMI- Body mass index WHtR- Waist height ratio.

274 For change values, negative number demonstrates improvement. Adjusted analysis were conducted using GEE  
 275 (specifying gaussian family and identity link function) adjusted for age, gender, BP at baseline, use of  
 276 antihypertensive medications, BMI and WHtR at baseline.

277

278 The proportions of participants who achieved the controlled BP target of <140/90 mm Hg were  
 279 62.2% (23) and 25.8% (8) for the intervention and usual care arms, respectively. The odds of  
 280 attaining blood pressure control in the intervention arm were significantly higher compared to the  
 281 usual care arm after adjusting for baseline BMI, baseline WHtR, age , gender and being on  
 282 antihypertensive drugs (AOR 2.8, 95% CI 1.3- 6.0, p=0.008) (Table 4). However, we did not  
 283 observe a significant difference in the odds of normal BMI between the treatment arms (AOR 2.5,  
 284 95% CI 0.6- 10.4, p=0.181) (Table 4).

285 **Table 4: Difference in odds of attaining BP control and normal BMI between treatment arms**

| Variable               | Arm                    | Unadjusted net mean change between the arms (95% CI) | P Value | Adjusted net mean change (95% CI) | P value |
|------------------------|------------------------|------------------------------------------------------|---------|-----------------------------------|---------|
| BP Controlled (Yes/No) | Usual Care (reference) | 3.2 (1.5-6.9)                                        | 0.004   | 2.8 (1.3-5.9)                     | 0.008   |
|                        | Intervention grp       |                                                      |         |                                   |         |
| Normal BMI (Yes/No)    | Usual Care             | 1.3 (0.4-3.8)                                        | 0.634   | 2.6 (0.6-10.4)                    | 0.181   |
|                        | Intervention grp       |                                                      |         |                                   |         |
|                        | Intervention grp       |                                                      |         |                                   |         |

286

### 287 **Adverse outcome**

288 There were no adverse outcomes (deaths) reported during the study.

### 289 **Discussion**

290 Our study provides evidence that a homebased lifestyle and BP monitoring intervention, delivered  
 291 by CHWs, was more effective in reducing SBP and DBP and in improving control of hypertension  
 292 in low-income urban population, compared to usual care. The completion rates of the follow-up  
 293 care were favorable for both the usual care (77%) and intervention arms (92%), indicating the  
 294 feasibility of implementing such interventions among an urban population. The better completion  
 295 rates for the intervention may be attributed to the interest among the participants cultivated through  
 296 the regular CHW home visits and audits of the progress that was not the case in the usual care arm.

297 After 6 months of follow-up, the study showed a significantly greater reduction in the mean  
298 adjusted SBP and DBP among the intervention than the usual care arm. Our findings are consistent  
299 with other studies(Gamage et al., 2020; He et al., 2017; Neupane et al., 2018) on the effect of lay  
300 health worker intervention programs for control of BP in LMICs. Our findings compare to those  
301 in a study done in Nepal with CHWs home-monitoring and education, which found 4.9mmHg and  
302 2.6 mmHg greater decrease in SBP and DBP, respectively, for the intervention arm compared to  
303 usual care arm after one year of follow-up (Neupane et al., 2018). Similarly, in a study done in  
304 Argentina among low-income population showed that participants with uncontrolled hypertension  
305 who participated in a community health worker–led multicomponent intervention had 6.6/5.4  
306 mmHg greater decrease in SBP and DBP, respectively, than did patients who received usual care  
307 after 18 months of follow-up (He et al., 2017) .The personalised health education and BP audits  
308 delivered by home visits in the current study might have encouraged participants to adopt healthy  
309 lifestyles and adhere to physicians instructions leading to controlled BP. Additionally, the CHW  
310 intervention comprised components that are evidence-based for lowering BP. These included  
311 regular home BP audits (Agarwal et al., 2011) , encouraging lifestyle changes of increased PA and  
312 losing weight (Aucott et al., 2009) as well as encouraging adherence to antihypertensive drugs for  
313 those on treatment (Matsumura et al., 2013).

314 The current study showed a reduction in BMI and WHtR in the intervention arm, compared to  
315 slight increase in the usual care arm. However, we did not observe a significant difference in the  
316 mean change BMI and WHtR between the treatment arms. Our findings are consistent with those  
317 of Gamage et al (2020) and He et al (2017) that showed a CHW-led intervention for control of  
318 hypertension had no effect on BMI and WHR (Gamage et al., 2020; He et al., 2017). Our findings

319 could be attributed to the short period of follow-up of six, which may not have resulted in  
320 significant changes in body weight to affect the body composition measures.

321 This feasibility study had some limitations. First, the duration of the intervention was limited to 6  
322 months, and therefore, it is difficult to determine the extent to which changes in BP and body  
323 composition could be sustained. Additionally, we cannot predict the effect of the intervention after  
324 6 months. Secondly, as a feasibility study with limited resources, we recruited a small sample size.  
325 However, the findings are crucial in informing the design of a fully powered RCT. Thirdly, the  
326 study may have had measurement bias for anthropometric measurements, but this was minimized  
327 through training of the enumerators on standard procedures and their support supervision. The  
328 strengths of the study are that, to the best of our knowledge, this is the first study investigating the  
329 feasibility and effectiveness of CHW home-delivered interventions for the reduction of BP among  
330 a poor urban population in Kenya. Secondly, the baseline and follow-up outcome assessment  
331 surveys were done by independent outcome assessors and the key BP outcome was measured using  
332 an automated device to minimize the risk of assessor's bias.

### 333 **Conclusion**

334 A CHW home based lifestyle intervention was effective in reducing BP and had a higher  
335 proportion of controlled hypertension compared to the usual care. These findings add to the body  
336 of knowledge on task-shifting interventions for treating high BP in LMICs. In particular, the study  
337 showed that utilization of CHWs from the already existing health-care systems of PHC in Kenya  
338 for management of hypertension is feasible in urban low-income settings of Kiambu County.  
339 Future fully powered RCT to test the effectiveness of such interventions are recommended.

340

341



## 342 **Acknowledgement**

343  
344 Our special thanks go to the participants in this study for their invaluable contributions to this  
345 study. We thank the community health workers who conducted the intervention. We also thank  
346 the Sub-county management teams for their assistant during the data collection

## 347 **Conflicts of interest**

348  
349 The authors declare that they have no conflicts of interest.

## 350 **Funding statement**

351  
352 This research was supported by the Consortium for Advanced Research Training in Africa  
353 (CARTA). CARTA is jointly led by the African Population and Health Research Center and the  
354 University of the Witwatersrand and funded by the Carnegie Corporation of New York (Grant No.  
355 G-19-57145), Sida (Grant No:54100113), Uppsala Monitoring Center, Norwegian Agency for  
356 Development Cooperation (Norad), and by the Wellcome Trust [reference no. 107768/Z/15/Z] and  
357 the UK Foreign, Commonwealth & Development Office, with support from the Developing  
358 Excellence in Leadership, Training and Science in Africa (DELTAS Africa) programme. The  
359 statements made and views expressed are solely the responsibility of the authors.

## 360 **References**

- 361 Agarwal, R., Bills, J. E., Hecht, T. J., & Light, R. P. (2011). Role of home blood pressure  
362 monitoring in overcoming therapeutic inertia and improving hypertension control: a  
363 systematic review and meta-analysis. *Hypertension*, 57(1), 29-38.
- 364 Ashwell, M., Gunn, P., & Gibson, S. (2012). Waist-to-height ratio is a better screening tool than  
365 waist circumference and BMI for adult cardiometabolic risk factors: systematic review and  
366 meta-analysis. *Obesity Reviews*, 13(3), 275-286.
- 367 Aucott, L., Rothnie, H., McIntyre, L., Thapa, M., Waweru, C., & Gray, D. (2009). Long-term  
368 weight loss from lifestyle intervention benefits blood pressure? A systematic review.  
369 *Hypertension*, 54(4), 756-762.
- 370 Brownstein, J. N., Bone, L. R., Dennison, C. R., Hill, M. N., Kim, M. T., & Levine, D. M. (2005).  
371 Community health workers as interventionists in the prevention and control of heart disease  
372 and stroke. *Am J Prev Med*, 29(5), 128-133.

- 373 Brownstein, J. N., Chowdhury, F. M., Norris, S. L., Horsley, T., Jack, L., Jr., Zhang, X., &  
374 Satterfield, D. (2007). Effectiveness of community health workers in the care of people  
375 with hypertension. *Am J Prev Med*, 32(5), 435-447.  
376 <https://doi.org/10.1016/j.amepre.2007.01.011>
- 377 Cappuccio, F. P., Kerry, S. M., Forbes, L., & Donald, A. (2004). Blood pressure control by home  
378 monitoring: meta-analysis of randomised trials. *Bmj*, 329(7458), 145.
- 379 Cappuccio, F. P., Kerry, S. M., Micah, F. B., Plange-Rhule, J., & Eastwood, J. B. (2006). A  
380 community programme to reduce salt intake and blood pressure in Ghana  
381 [ISRCTN88789643]. *BMC Public Health*, 6(1), 13.
- 382 Craig, C. L., Marshall, A. L., Sjöström, M., Bauman, A. E., Booth, M. L., Ainsworth, B. E., Pratt,  
383 M., Ekelund, U., Yngve, A., Sallis, J. F., & Oja, P. (2003). International physical activity  
384 questionnaire: 12-country reliability and validity. *Med Sci Sports Exerc*, 35(8), 1381-1395.  
385 <https://doi.org/10.1249/01.Mss.0000078924.61453.Fb>
- 386 Division of Non-Communicable Diseases-Ministry of Health. (2018). *Kenya National Guidelines*  
387 *for Cardiovascular Diseases Management*.
- 388 Filippou, C. D., Tsioufis, C. P., Thomopoulos, C. G., Mihas, C. C., Dimitriadis, K. S.,  
389 Sotiropoulou, L. I., Chrysochoou, C. A., Nihoyannopoulos, P. I., & Tousoulis, D. M.  
390 (2020). Dietary Approaches to Stop Hypertension (DASH) Diet and Blood Pressure  
391 Reduction in Adults with and without Hypertension: A Systematic Review and Meta-  
392 Analysis of Randomized Controlled Trials. *Adv Nutr*.  
393 <https://doi.org/10.1093/advances/nmaa041>
- 394 Gabb, G. M., Mangoni, A. A., Anderson, C. S., Cowley, D., Dowden, J. S., Golledge, J., Hankey,  
395 G. J., Howes, F. S., Leckie, L., Perkovic, V., Schlaich, M., Zwar, N. A., Medley, T. L., &  
396 Arnolda, L. (2016). Guideline for the diagnosis and management of hypertension in adults  
397 - 2016. *Med J Aust*, 205(2), 85-89. <https://doi.org/10.5694/mja16.00526>
- 398 Gamage, D. G., Riddell, M. A., Joshi, R., Thankappan, K. R., Chow, C. K., Oldenburg, B., Evans,  
399 R. G., Mahal, A. S., Kalyanram, K., Kartik, K., & et al. (2020). Effectiveness of a scalable  
400 group-based education and monitoring program, delivered by health workers, to improve  
401 control of hypertension in rural India: a cluster randomised controlled trial [Journal Article;  
402 Randomized Controlled Trial; Research Support, Non-U.S. Gov't]. *PLoS Med*, 17(1),  
403 e1002997. <https://doi.org/10.1371/journal.pmed.1002997>
- 404 Gilmore, B., & McAuliffe, E. (2013). Effectiveness of community health workers delivering  
405 preventive interventions for maternal and child health in low-and middle-income countries:  
406 a systematic review. *BMC Public Health*, 13(1), 847.
- 407 Glynn, L. G., Murphy, A. W., Smith, S. M., Schroeder, K., & Fahey, T. (2010). Self-monitoring  
408 and other non-pharmacological interventions to improve the management of hypertension  
409 in primary care: a systematic review. *British Journal of General Practice*, 60(581), e476-  
410 e488.
- 411 Gouda, H. N., Charlson, F., Sorsdahl, K., Ahmadzada, S., Ferrari, A. J., Erskine, H., Leung, J.,  
412 Santamauro, D., Lund, C., Aminde, L. N., Mayosi, B. M., Kengne, A. P., Harris, M.,  
413 Achoki, T., Wiysonge, C. S., Stein, D. J., & Whiteford, H. (2019). Burden of non-  
414 communicable diseases in sub-Saharan Africa, 1990-2017: results from the Global Burden  
415 of Disease Study 2017. *Lancet Glob Health*, 7(10), e1375-e1387.  
416 [https://doi.org/10.1016/S2214-109X\(19\)30374-2](https://doi.org/10.1016/S2214-109X(19)30374-2)
- 417 He, J., Irazola, V., Mills, K. T., Poggio, R., Beratarrechea, A., Dolan, J., Chen, C.-S., Gibbons, L.,  
418 Krousel-Wood, M., Bazzano, L. A., Nejamis, A., Gulayin, P., Santero, M., Augustovski,

- 419 F., Chen, J., Rubinstein, A., & Investigators, H. (2017). Effect of a Community Health  
420 Worker-Led Multicomponent Intervention on Blood Pressure Control in Low-Income  
421 Patients in Argentina: A Randomized Clinical Trial. *Jama*, 318(11), 1016-1025.  
422 <https://doi.org/10.1001/jama.2017.11358>
- 423 Jafar, T., Hatcher, J., Poulter, N., Islam, M., Hashmi, S., Qadri, Z., Bux, R., Khan, A., Jafary, F.,  
424 & Hameed, A. (2009). Hypertension Research Group: Community-based interventions to  
425 promote blood pressure control in a developing country: a cluster randomized trial. *Ann*  
426 *Intern Med*, 151(9), 593-601.
- 427 Jeet, G., Thakur, J. S., Prinja, S., & Singh, M. (2017). Community health workers for non-  
428 communicable diseases prevention and control in developing countries: Evidence and  
429 implications. *PLoS One*, 12(7), e0180640-e0180640.  
430 <https://doi.org/10.1371/journal.pone.0180640>
- 431 Kenya Ministry of Health. (2016). *Kenya STEPwise Survey for Non Communicable Diseases Risk*  
432 *Factors 2015 report*. Nairobi: Ministry of Health, Division of Non-  
433 Communicable Diseases. Retrieved 11th March from [http://www.health.go.ke/wp-](http://www.health.go.ke/wp-content/uploads/2016/04/Steps-Report-NCD-2015.pdf)  
434 [content/uploads/2016/04/Steps-Report-NCD-2015.pdf](http://www.health.go.ke/wp-content/uploads/2016/04/Steps-Report-NCD-2015.pdf)
- 435 Kok, M. C., Dieleman, M., Taegtmeier, M., Broerse, J. E., Kane, S. S., Ormel, H., Tijm, M. M.,  
436 & de Koning, K. A. (2015). Which intervention design factors influence performance of  
437 community health workers in low-and middle-income countries? A systematic review.  
438 *Health Policy Plan*, 30(9), 1207-1227.
- 439 Matsumura, K., Arima, H., Tominaga, M., Ohtsubo, T., Sasaguri, T., Fujii, K., Fukuhara, M.,  
440 Uezono, K., Morinaga, Y., & Ohta, Y. (2013). Impact of antihypertensive medication  
441 adherence on blood pressure control in hypertension: the COMFORT study. *QJM: An*  
442 *International Journal of Medicine*, 106(10), 909-914.
- 443 Mbuthia, G. W., Magutah, K., & Pellowski, J. (2022). Approaches and outcomes of community  
444 health worker's interventions for hypertension management and control in low-income and  
445 middle-income countries: systematic review. *BMJ Open*, 12(4), e053455.
- 446 Moucheraud, C. (2018). Service readiness for noncommunicable diseases was low in five countries  
447 in 2013–15. *Health Affairs*, 37(8), 1321-1330.
- 448 Neupane, D., McLachlan, C. S., Mishra, S. R., Olsen, M. H., Perry, H. B., Karki, A., & Kallestrup,  
449 P. (2018). Effectiveness of a lifestyle intervention led by female community health  
450 volunteers versus usual care in blood pressure reduction (COBIN): an open-label, cluster-  
451 randomised trial. *The Lancet Global Health*, 6(1), e66-e73.  
452 [https://doi.org/https://doi.org/10.1016/S2214-109X\(17\)30411-4](https://doi.org/https://doi.org/10.1016/S2214-109X(17)30411-4)
- 453 Pescatello, L. S., Buchner, D. M., Jakicic, J. M., Powell, K. E., Kraus, W. E., Bloodgood, B.,  
454 Campbell, W. W., Dietz, S., DiPietro, L., & George, S. M. (2019). Physical activity to  
455 prevent and treat hypertension: A systematic review. *Medicine & Science in Sports &*  
456 *Exercise*, 51(6), 1314-1323.
- 457 Pickering, T. G., Miller, N. H., Ogedegbe, G., Krakoff, L. R., Artinian, N. T., & Goff, D. (2008).  
458 Call to action on use and reimbursement for home blood pressure monitoring: a joint  
459 scientific statement from the American Heart Association, American Society of  
460 Hypertension, and Preventive Cardiovascular Nurses Association. *Hypertension*, 52(1),  
461 10-29.
- 462 Poster Abstracts from the 7th Annual CUGH Conference: Bridging to a Sustainable Future in  
463 Global Health. (2016). [Conference Review]. *Annals of global health*, 82(3).

- 464 [https://www.embase.com/search/results?subaction=viewrecord&id=L614045063&from=](https://www.embase.com/search/results?subaction=viewrecord&id=L614045063&from=export)  
465 [export](https://www.embase.com/search/results?subaction=viewrecord&id=L614045063&from=export)
- 466 Saneei, P., Salehi-Abargouei, A., Esmailzadeh, A., & Azadbakht, L. (2014). Influence of Dietary  
467 Approaches to Stop Hypertension (DASH) diet on blood pressure: a systematic review and  
468 meta-analysis on randomized controlled trials. *Nutrition, Metabolism and Cardiovascular*  
469 *Diseases*, 24(12), 1253-1261.
- 470 Siervo, M., Lara, J., Chowdhury, S., Ashor, A., Oggioni, C., & Mathers, J. C. (2015). Effects of  
471 the Dietary Approach to Stop Hypertension (DASH) diet on cardiovascular risk factors: a  
472 systematic review and meta-analysis. *British Journal of Nutrition*, 113(1), 1-15.
- 473 Smart, N. A., Howden, R., Cornelissen, V., Brook, R., McGowan, C., Millar, P. J., Ritti-Dias, R.,  
474 Baross, A., Carlson, D. J., & Wiles, J. D. (2020). Physical Activity to Prevent and Treat  
475 Hypertension: A Systematic Review. *Medicine and Science in Sports and Exercise*, 52(4),  
476 1001-1002.
- 477 Stergiou, G. S., & Bliziotis, I. A. (2011). Home blood pressure monitoring in the diagnosis and  
478 treatment of hypertension: a systematic review. *American journal of hypertension*, 24(2),  
479 123-134.
- 480 Tucker, K. L., Sheppard, J. P., Stevens, R., Bosworth, H. B., Bove, A., Bray, E. P., Earle, K.,  
481 George, J., Godwin, M., & Green, B. B. (2017). Self-monitoring of blood pressure in  
482 hypertension: a systematic review and individual patient data meta-analysis. *PLoS Med*,  
483 14(9), e1002389.
- 484 Vedanthan, R., Kamano, J. H., DeLong, A. K., Naanyu, V., Binanay, C. A., Bloomfield, G. S.,  
485 Chrysanthopoulou, S. A., Finkelstein, E. A., Hogan, J. W., & Horowitz, C. R. (2019).  
486 Community health workers improve linkage to hypertension care in western Kenya.  
487 *Journal of the American College of Cardiology*, 74(15), 1897-1906.
- 488 Verberk, W. J., Kroon, A. A., Kessels, A. G., & de Leeuw, P. W. (2005). Home blood pressure  
489 measurement: a systematic review. *Journal of the American College of Cardiology*, 46(5),  
490 743-751.
- 491 Whelton, S. P., Chin, A., Xin, X., & He, J. (2002). Effect of aerobic exercise on blood pressure: a  
492 meta-analysis of randomized, controlled trials. *Ann Intern Med*, 136(7), 493-503.
- 493 Woldie, M., Feyissa, G. T., Admasu, B., Hassen, K., Mitchell, K., Mayhew, S., McKee, M., &  
494 Balabanova, D. (2018). Community health volunteers could help improve access to and  
495 use of essential health services by communities in LMICs: an umbrella review. *Health*  
496 *Policy Plan*, 33(10), 1128-1143.
- 497 World Health Organization. Global Health Workforce Alliance. Global experience of community  
498 health workers for delivery of health related millennium development goals: a systematic  
499 review, country case studies, and recommendations for integration into national health  
500 systems. 2010 [cited 2011 Mar 22]. In.
- 501 World Health Organization. (2000). Obesity: preventing and managing the global epidemic.
- 502 World Health Organization. (2014). *Global status report on noncommunicable diseases 2014*.  
503 World Health Organization.

504

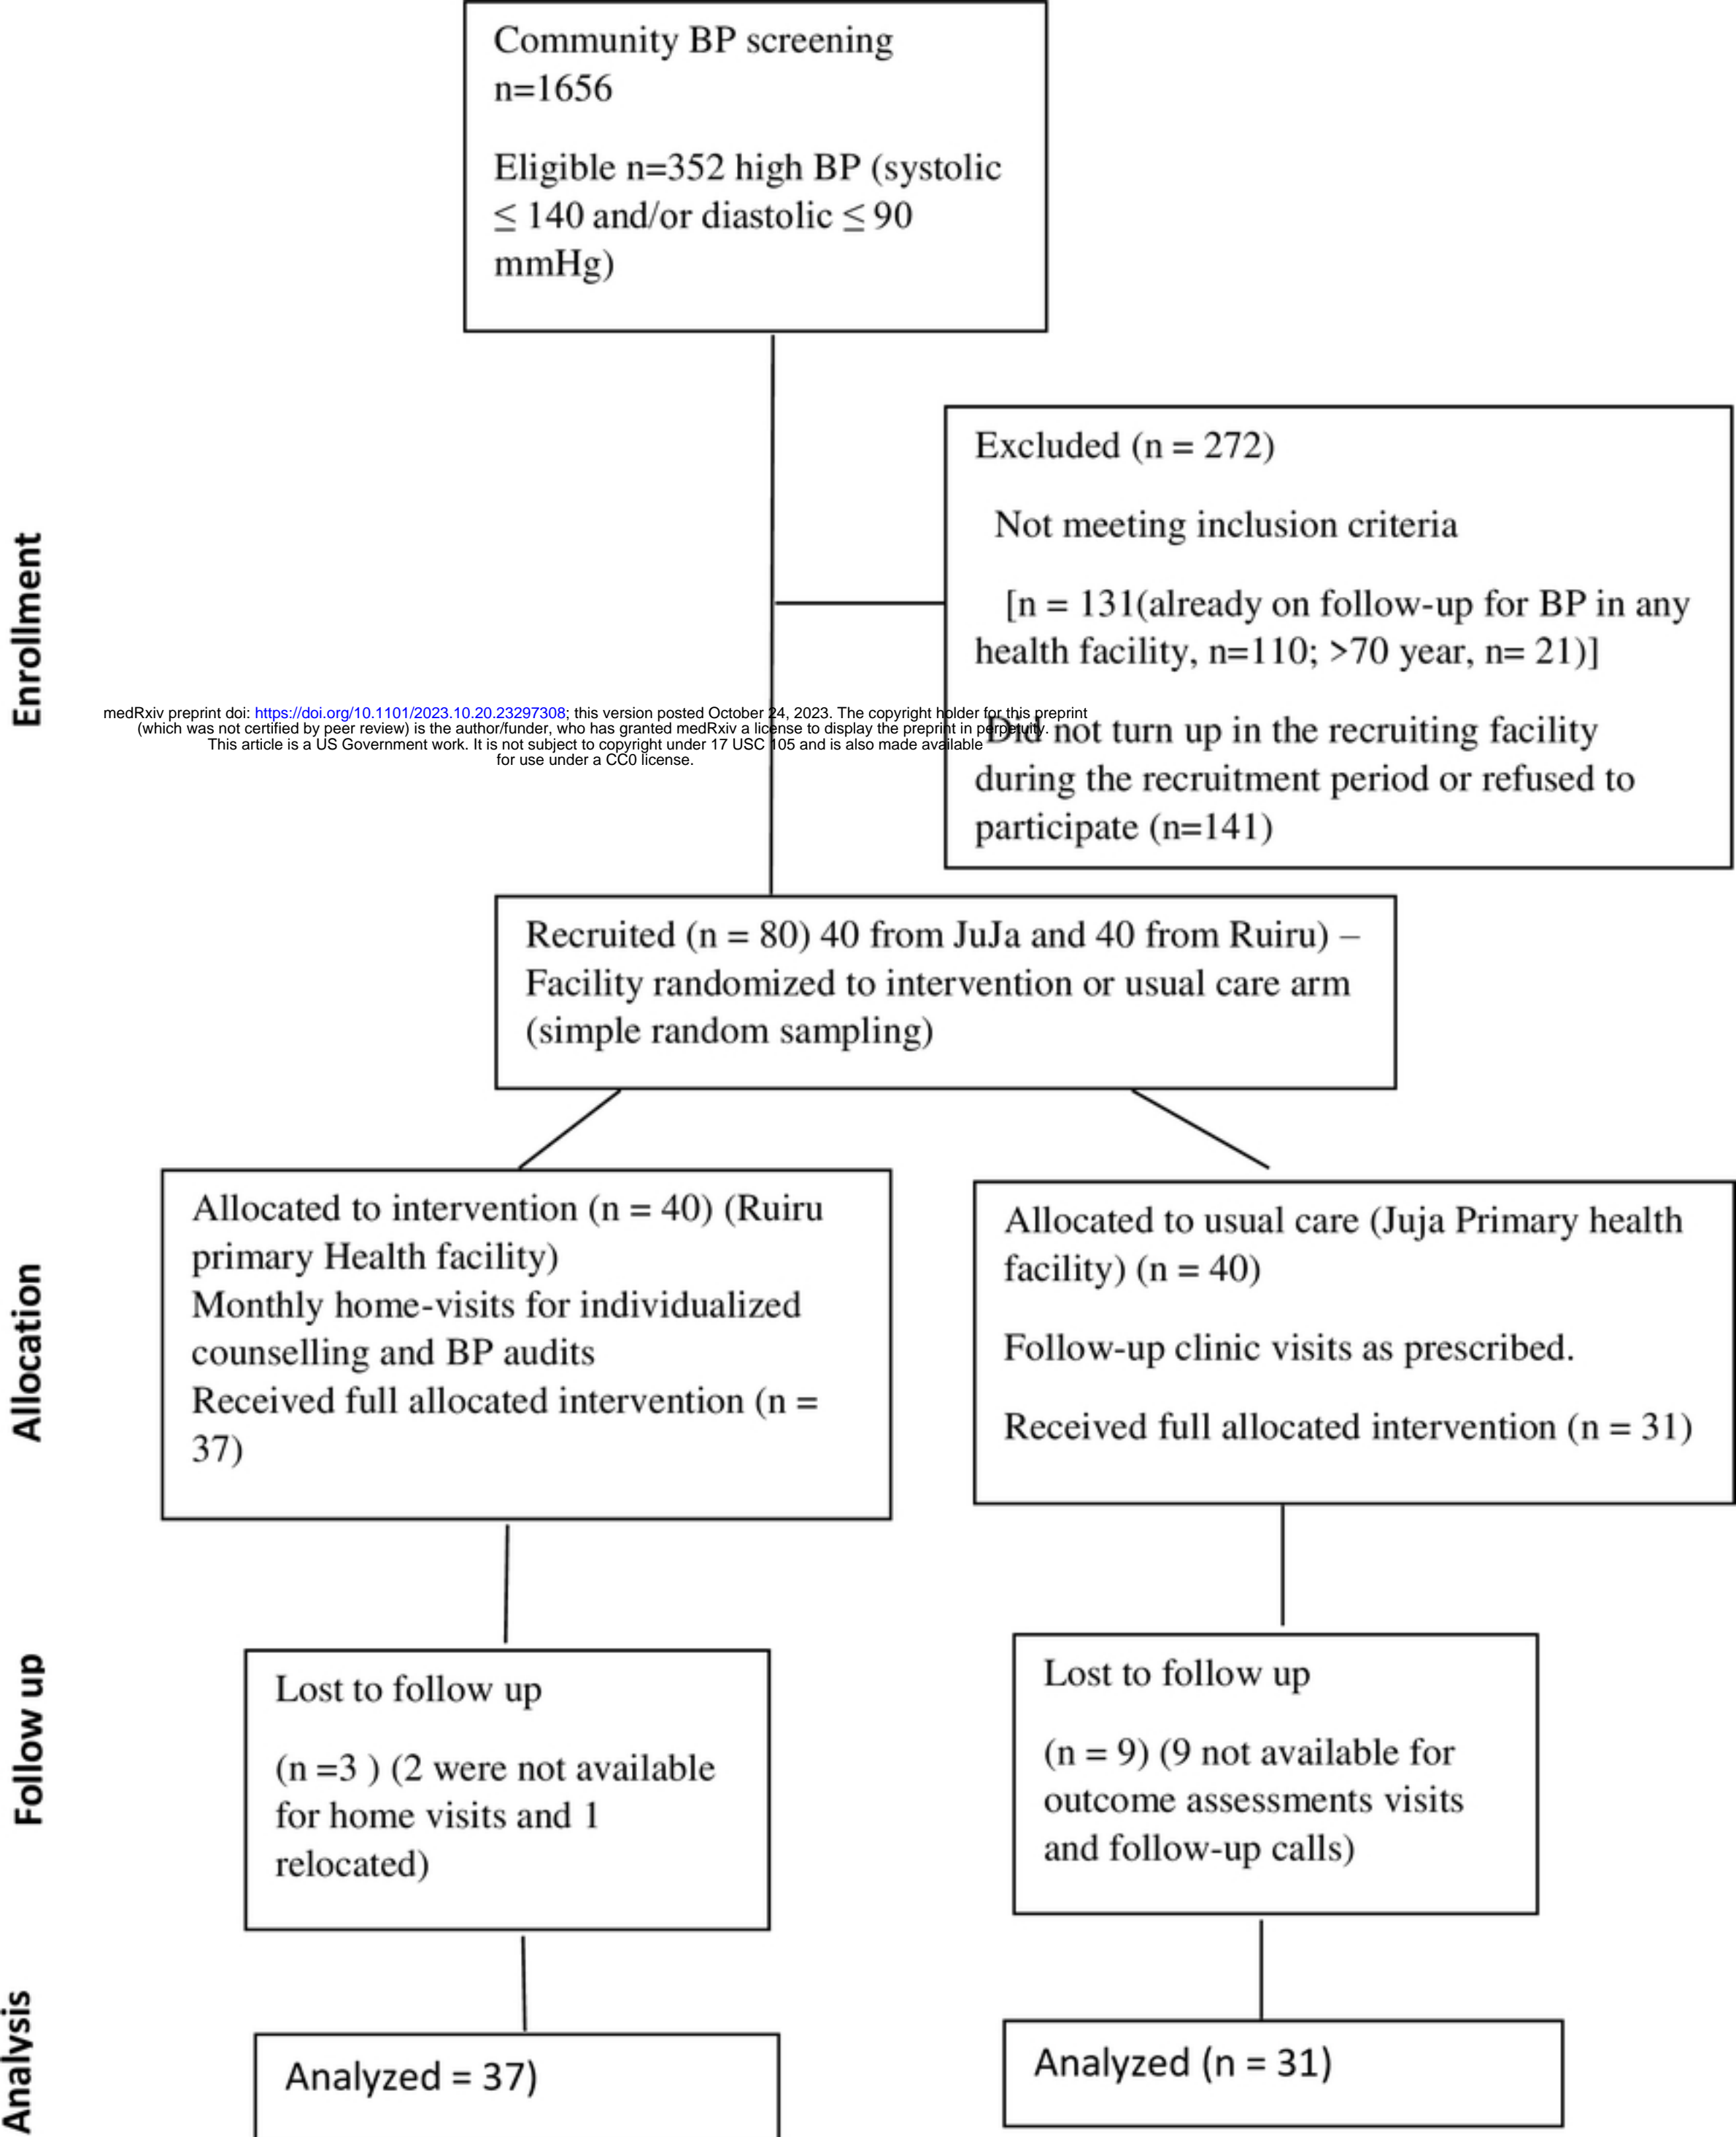

Figure 1

# Mean Change in Blood Pressure after 6 Months

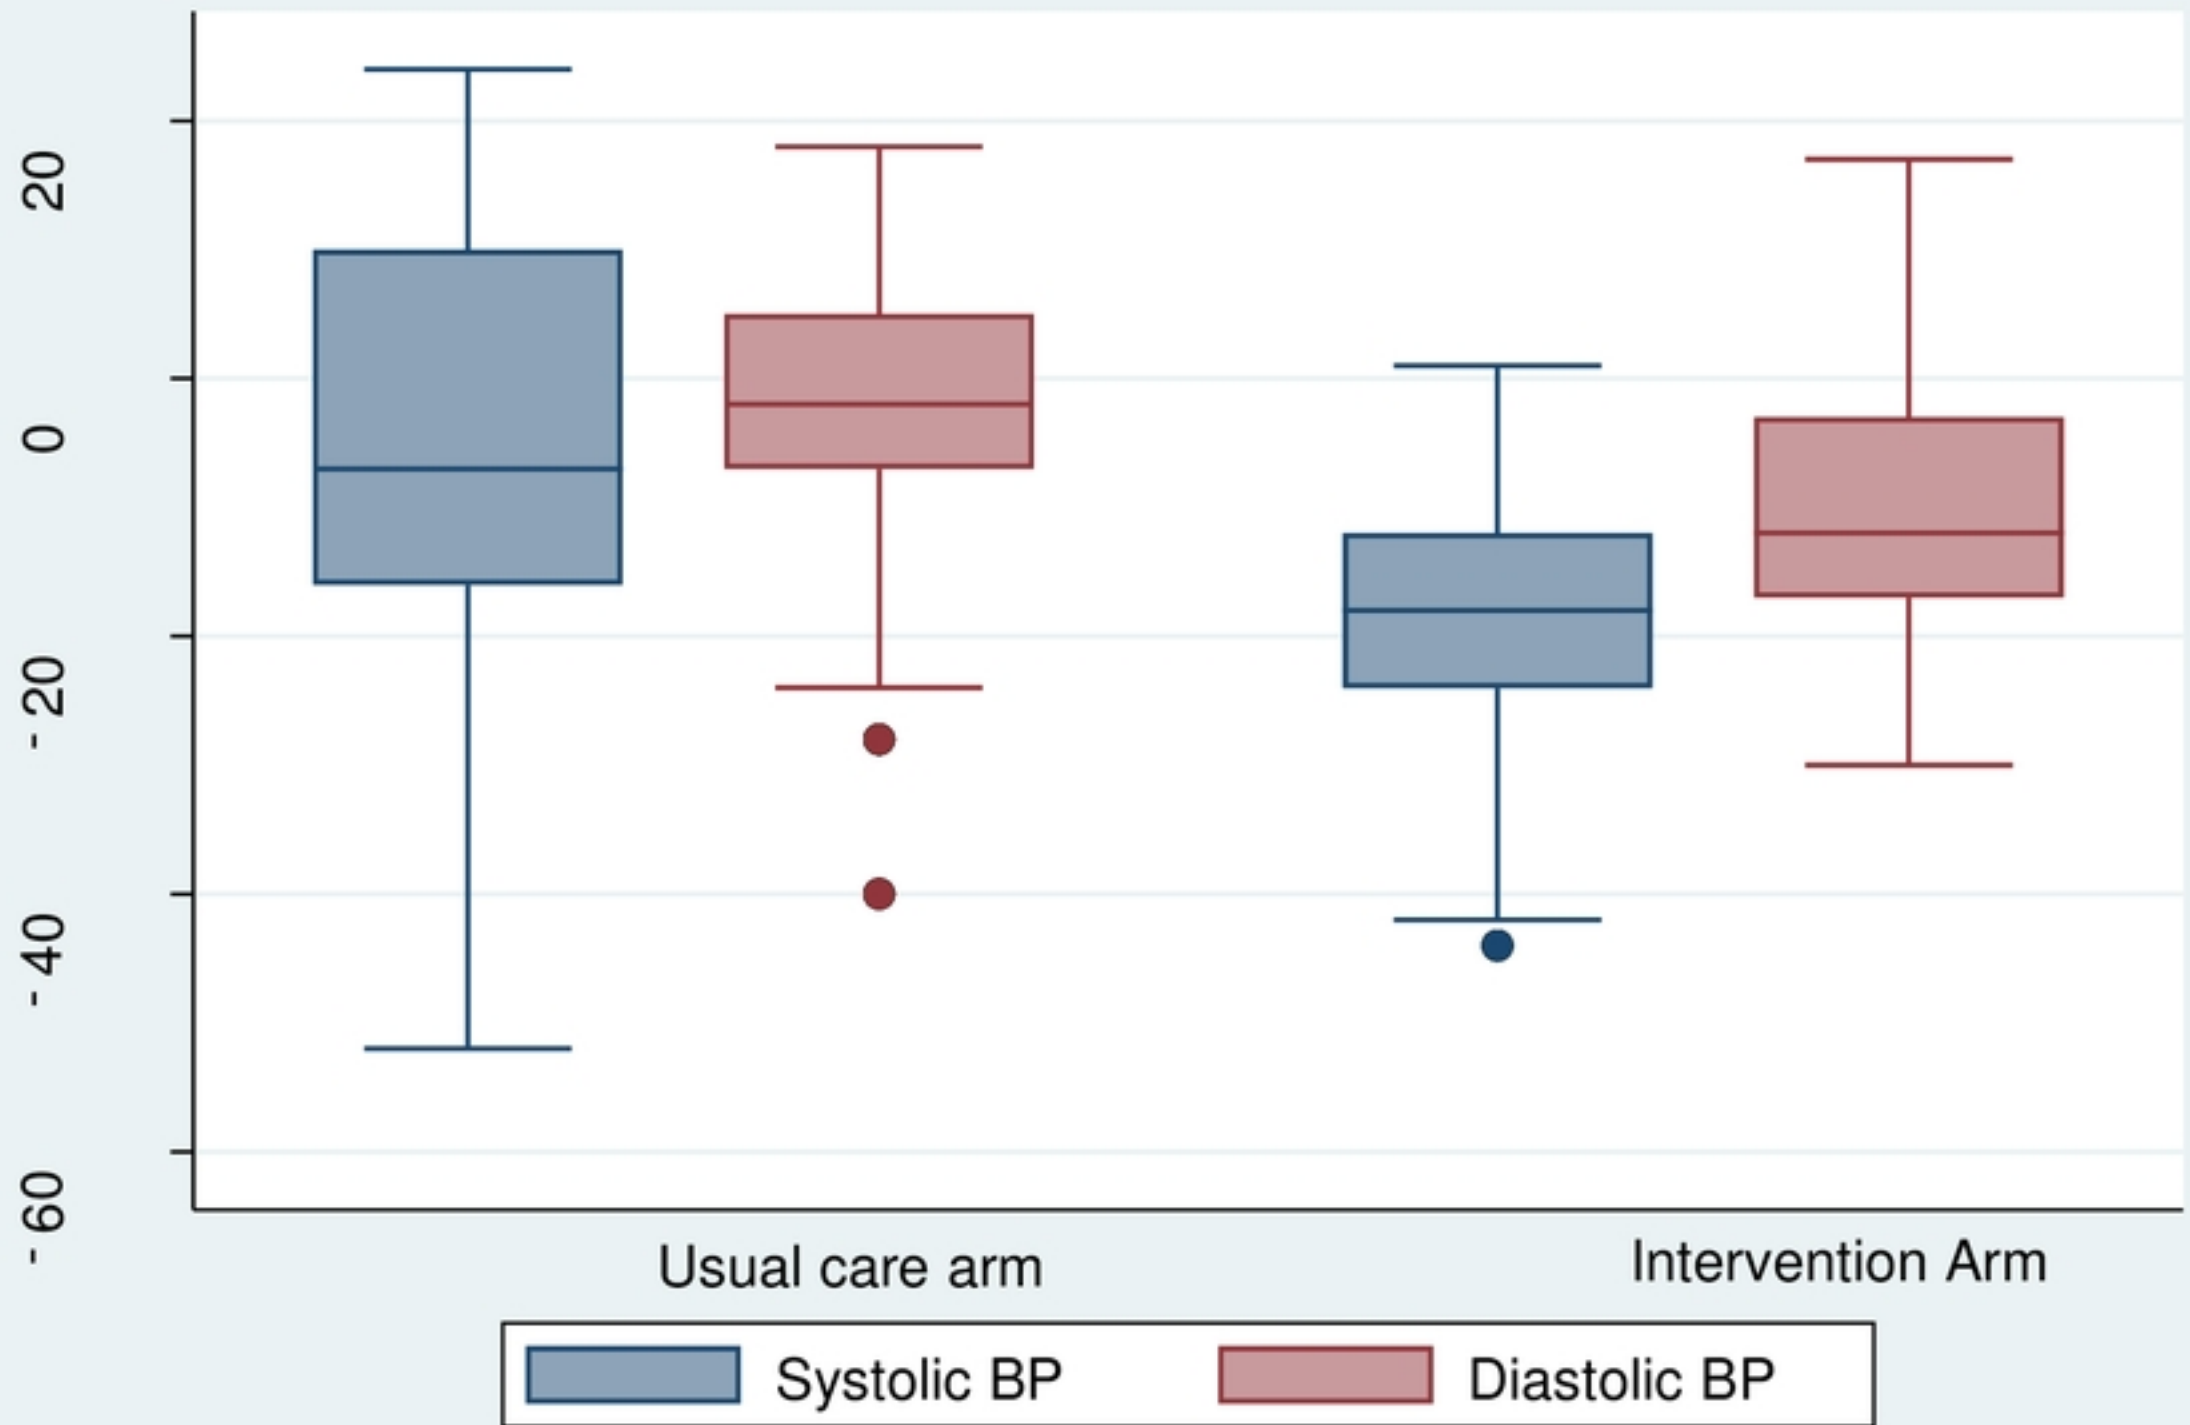

Figure 2
